# Supplementary material
Source: publisher figshare collection journal article supplement (https://acs.figshare.com/ndownloader/files/13470524)
Supplement: Supplementary file 1 [file 13470524]

# Supporting Information

## Strain-induced Band Structure Modulation in Hexagonal Boron Phosphide/Blue Phosphorene vdW Heterostructure

Jialin Li,<sup>a</sup> Haiming Duan,<sup>a</sup> Bowen Zeng,<sup>b</sup> Qun Jing,<sup>a</sup> Biaobin Cao,<sup>a</sup> Fengjuan Chen<sup>a</sup> and Mengqiu Long<sup>a,b,\*</sup>

<sup>a</sup> Institute of Low-dimensional Quantum Materials and Devices, School of Physical Science and Technology, Xinjiang University, Urumqi, 830046, China

<sup>b</sup> Hunan Key laboratory of Super Micro-structure and Ultrafast Process, School of Physics and Electronics, Central South University, Changsha 410083, China

\*E-mail addresses: mqlong@csu.edu.cn (M. Long)

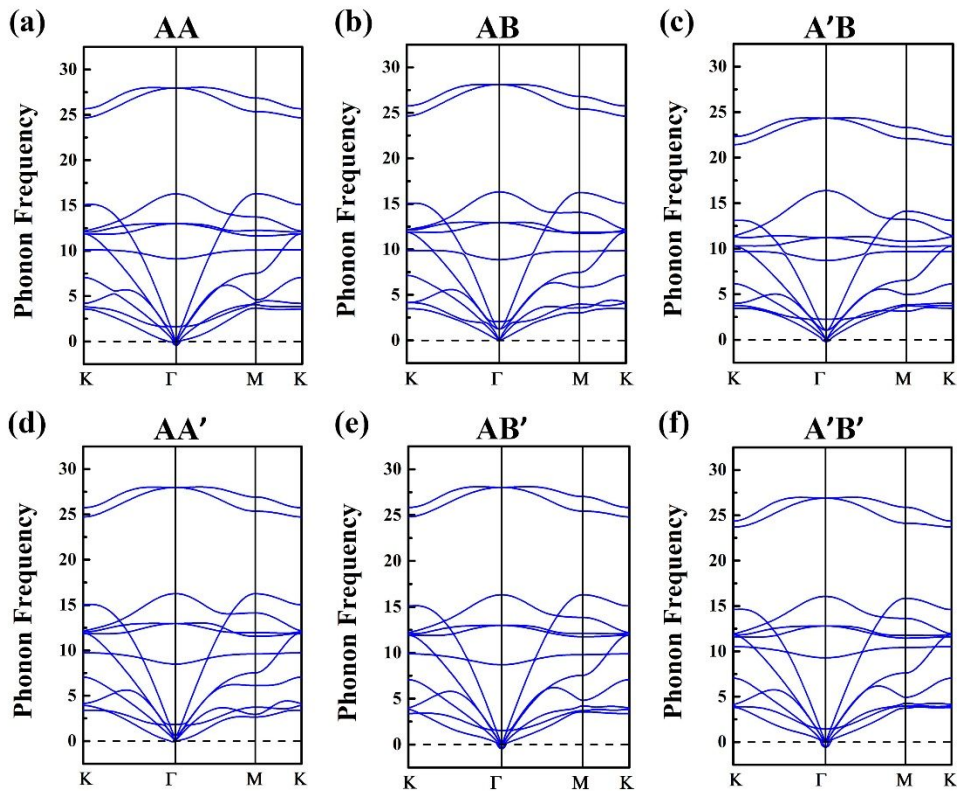

**Figure S1.** The phonon frequency for each stacking pattern.

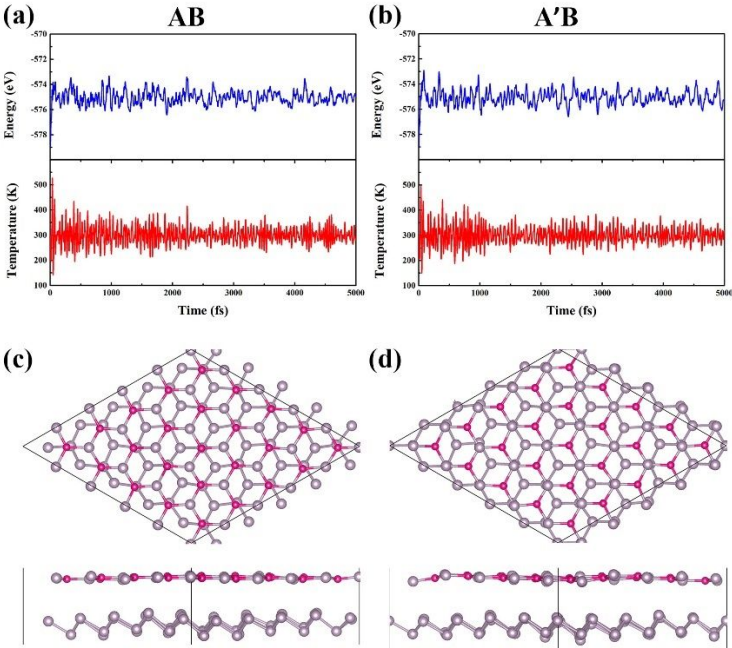

**Figure S2.** Total energy and temperature fluctuations with respect to molecular dynamic (MD) steps at 300K for AB (a), A'B (b) stacking patterns of the *h*-BP/BlueP heterostructure. After 5000 steps, supercell structures for AB (c) and A'B (d) stacking patterns of the *h*-BP/BlueP heterostructure.

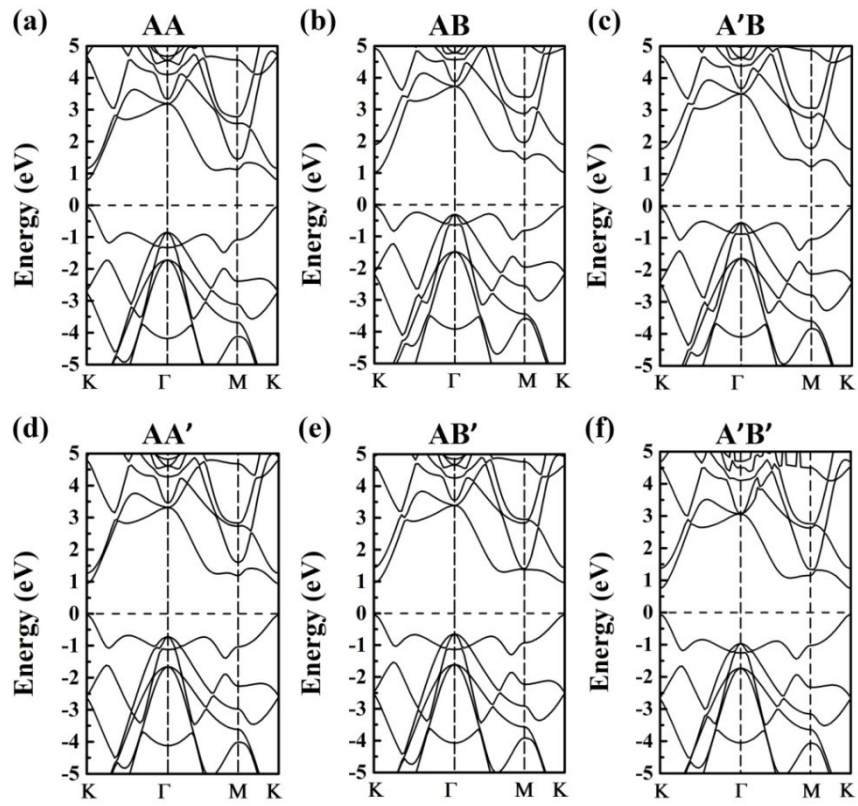

**Figure S3.** Band structures of AA (a), AB (b), A'B (c), A'A (d), AB' (e) and A'B' (f) stacking patterns for the *h*-BP/BlueP heterostructure by PBE functional.

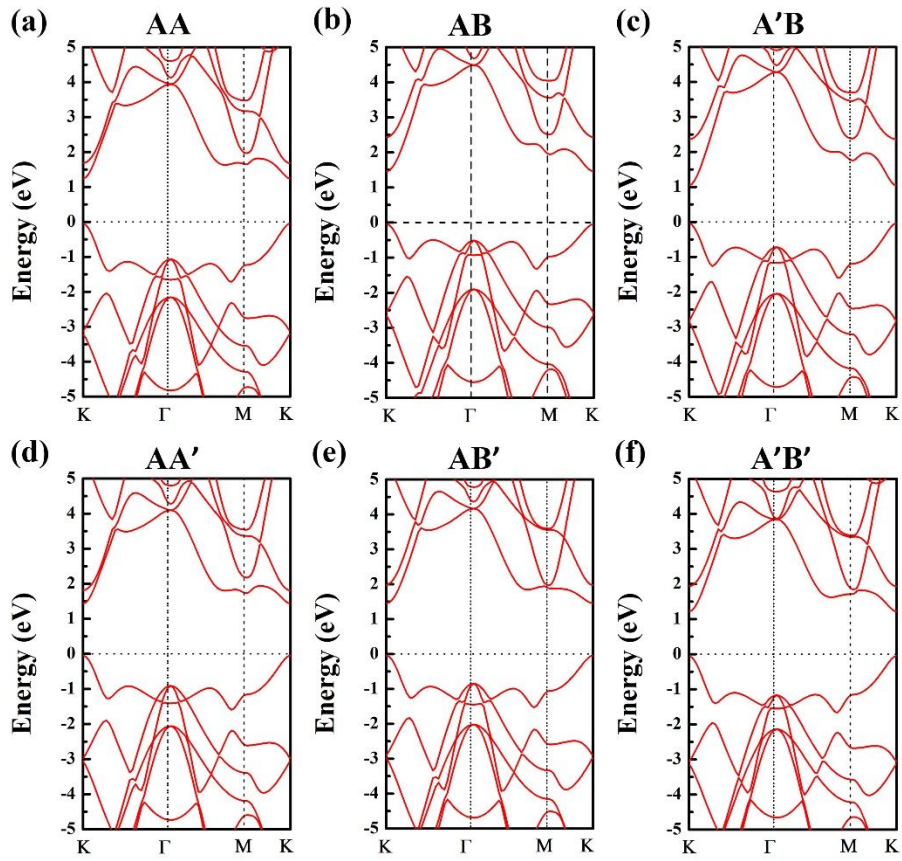

**Figure S4.** Band structures of AA (a), AB (b), A'B (c), A'A (d), AB' (e) and A'B' (f) stacking patterns for the *h*-BP/BlueP heterostructure by HSE06 functional.

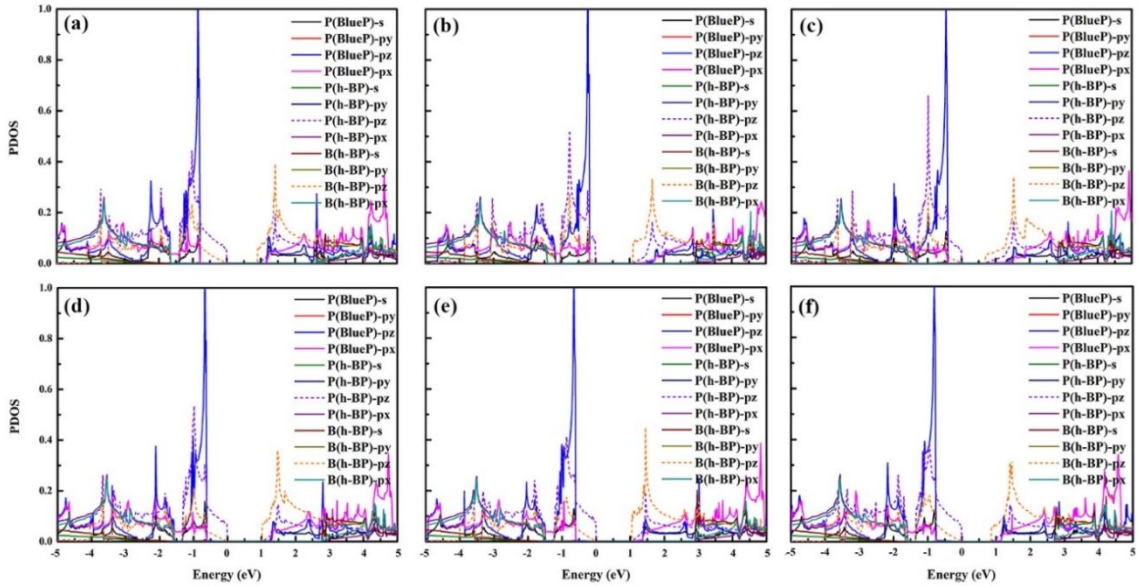

**Figure S5.** Partial density of states of AA (a), AB (b), A'B (c), A'A (d), AB' (e) and A'B' (f) stacking patterns for the *h*-BP/BlueP heterostructure by PBE functional.

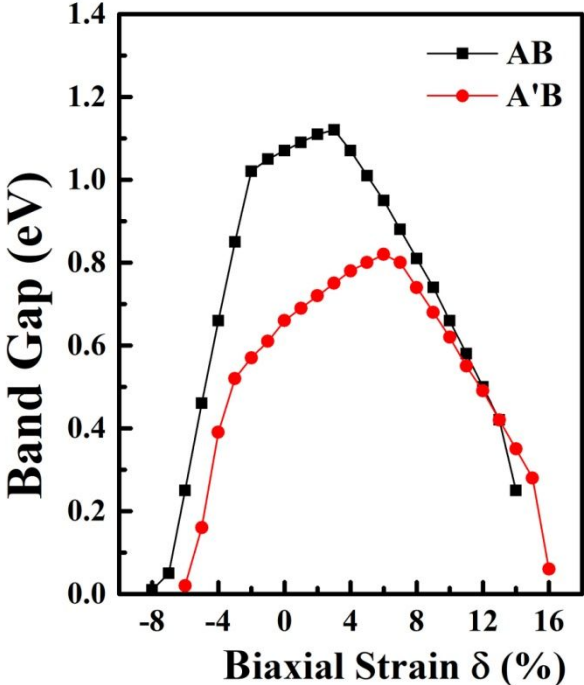

**Figure S6.** Energy band gap as a function of biaxial strain  $\delta$ .
